# Supplementary material for: Electrochemical performance of highly amorphous GeOx powders synthesized in different alcohols for use in Na- and Li-ion batteries
Source: Royal Society of Chemistry journal article supplement (doi:10.1039/c6ra20794d), 2016-01-01
Supplement: c6ra20794d1.pdf [file c6ra20794d1.pdf]

## Supporting Information

### Electrochemical performances of highly amorphous $\text{GeO}_x$ powders synthesized in different alcohols for use in Na- and Li-ion batteries

Tetsuya Kajita\* and Takashi Itoh.

Frontier Research Institute for Interdisciplinary Sciences, Tohoku University, 6-3 Aoba, Aramaki-aza,  
Aoba-ku, Sendai-shi Miyagi-ken, 980-8579, Japan

\*Corresponding author

E-mail: kajita@fris.tohoku.ac.jp

### *Contents of supporting information*

**Figure S1** Schematic of expected process of forming  $\text{GeO}_x$  powders.

**Figure S2** XRD patterns of the amorphous  $\text{GeO}_x$  powders synthesized by oxidation using different alcohols.

**Figure S3.** The second charge/discharge curves of the amorphous  $\text{GeO}_x$  electrodes. (a) 2<sup>nd</sup> cycle in Li-ion cells and (b) 2<sup>nd</sup> cycle in Na-ion cells.

**Table S1** Contribution ratio of Ge states in amorphous  $\text{GeO}_x$  electrode from deconvolution of Ge 3d spectra.

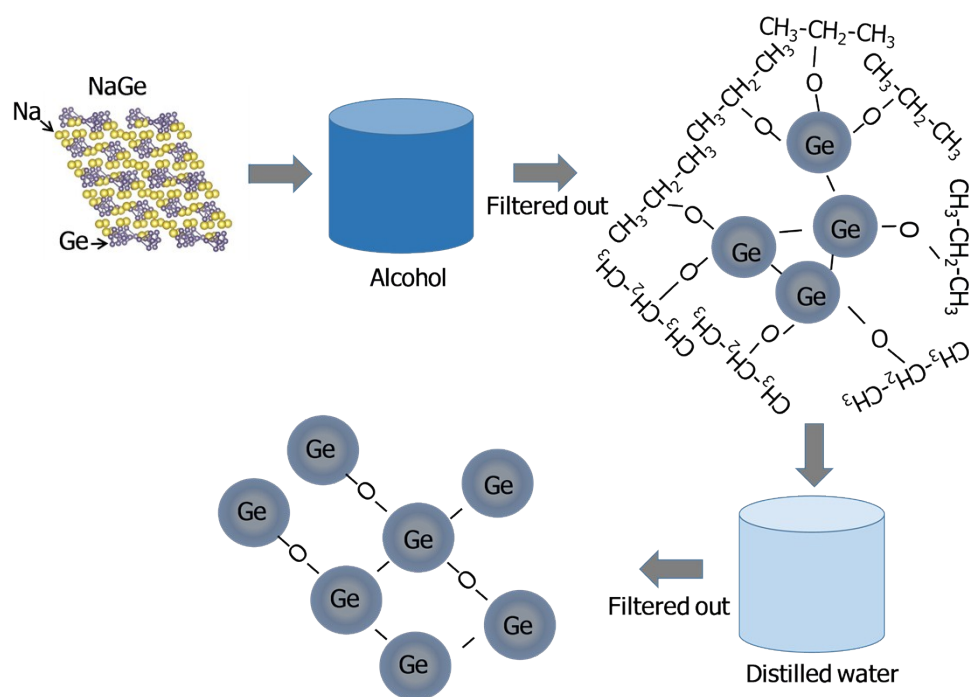

**Figure S1** Schematic of expected process of forming GeO<sub>x</sub> powders.

**XRD patterns of the amorphous  $\text{GeO}_x$  powders synthesized by oxidation using different alcohols.**

The broad peaks at approximately  $25^\circ$  and  $50^\circ$  are assignable to amorphous  $\text{GeO}$ . In the case of the electrode of the powder synthesized using methanol, the sharp peaks at  $2\theta$  of  $26^\circ$  is assignable to  $\text{GeO}_2$ .

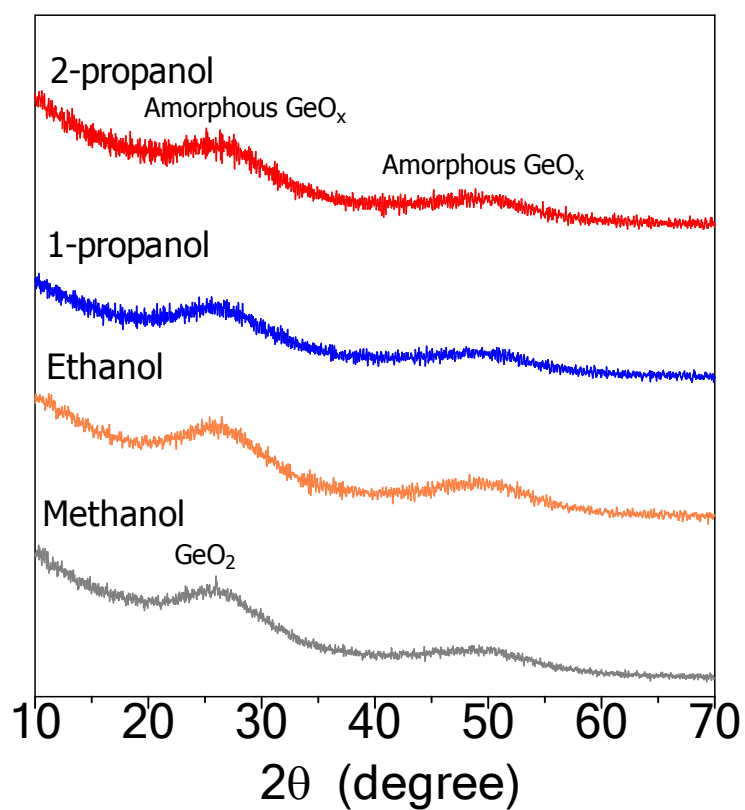

**Figure S2** XRD patterns of the amorphous  $\text{GeO}_x$  powders synthesized by oxidation using different alcohols.

### The second charge/discharge curves of the amorphous GeO<sub>x</sub> electrodes

The second charge/discharge curves of the amorphous GeO<sub>x</sub> electrodes are shown in Figure S1. During the 2<sup>nd</sup> cycle of the Li-ion cell, the electrodes exhibited reversible capacities of 1239–1213 mAh g<sup>-1</sup> and an efficiency of 90 %. On the other hand, the electrodes used in the Na-ion cell exhibited reversible capacities of 310–319 mAh g<sup>-1</sup> and an efficiency of 93 %.

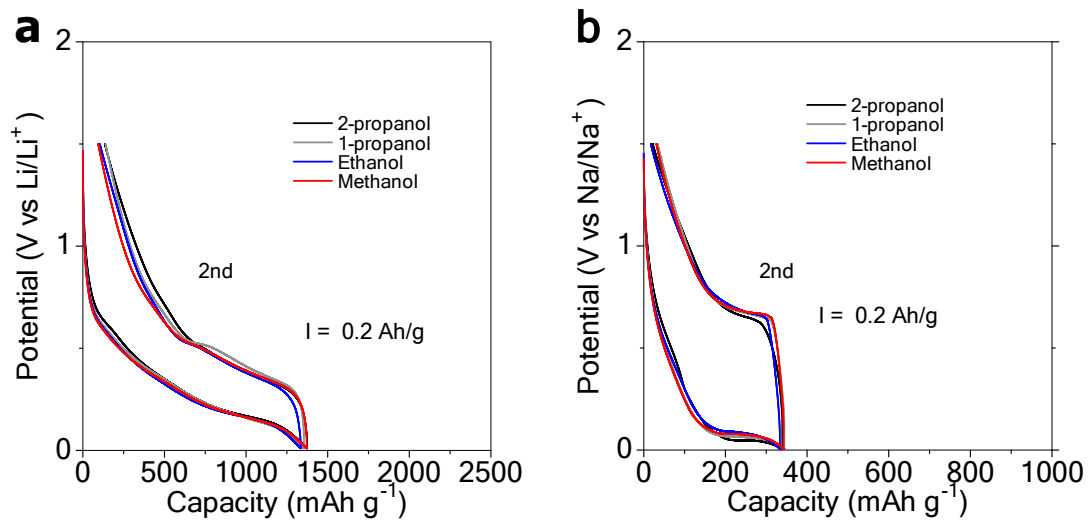

**Figure S3** The second charge/discharge curves of the amorphous GeO<sub>x</sub> electrodes. (a) 2<sup>nd</sup> cycle in Li-ion cells and (b) 2<sup>nd</sup> cycle in Na-ion cells.

**Table S1** Contribution ratio of Ge states in amorphous GeO<sub>x</sub> electrode from deconvolution of Ge 3d spectra.

| Contribution ratio of Ge states in amorphous GeO <sub>x</sub> electrode |    |      |      |
|-------------------------------------------------------------------------|----|------|------|
| (%)                                                                     |    |      |      |
|                                                                         | Ge | Ge+2 | Ge+4 |
| 2-propanol                                                              | 35 | 25   | 40   |
| 1-propanol                                                              | 43 | 24   | 33   |
| Ethanol                                                                 | 35 | 30   | 35   |
| Methanol                                                                | 50 | 15   | 40   |
